# Supplementary material
Source: PubMed Central journal article supplement (PMC6418775)

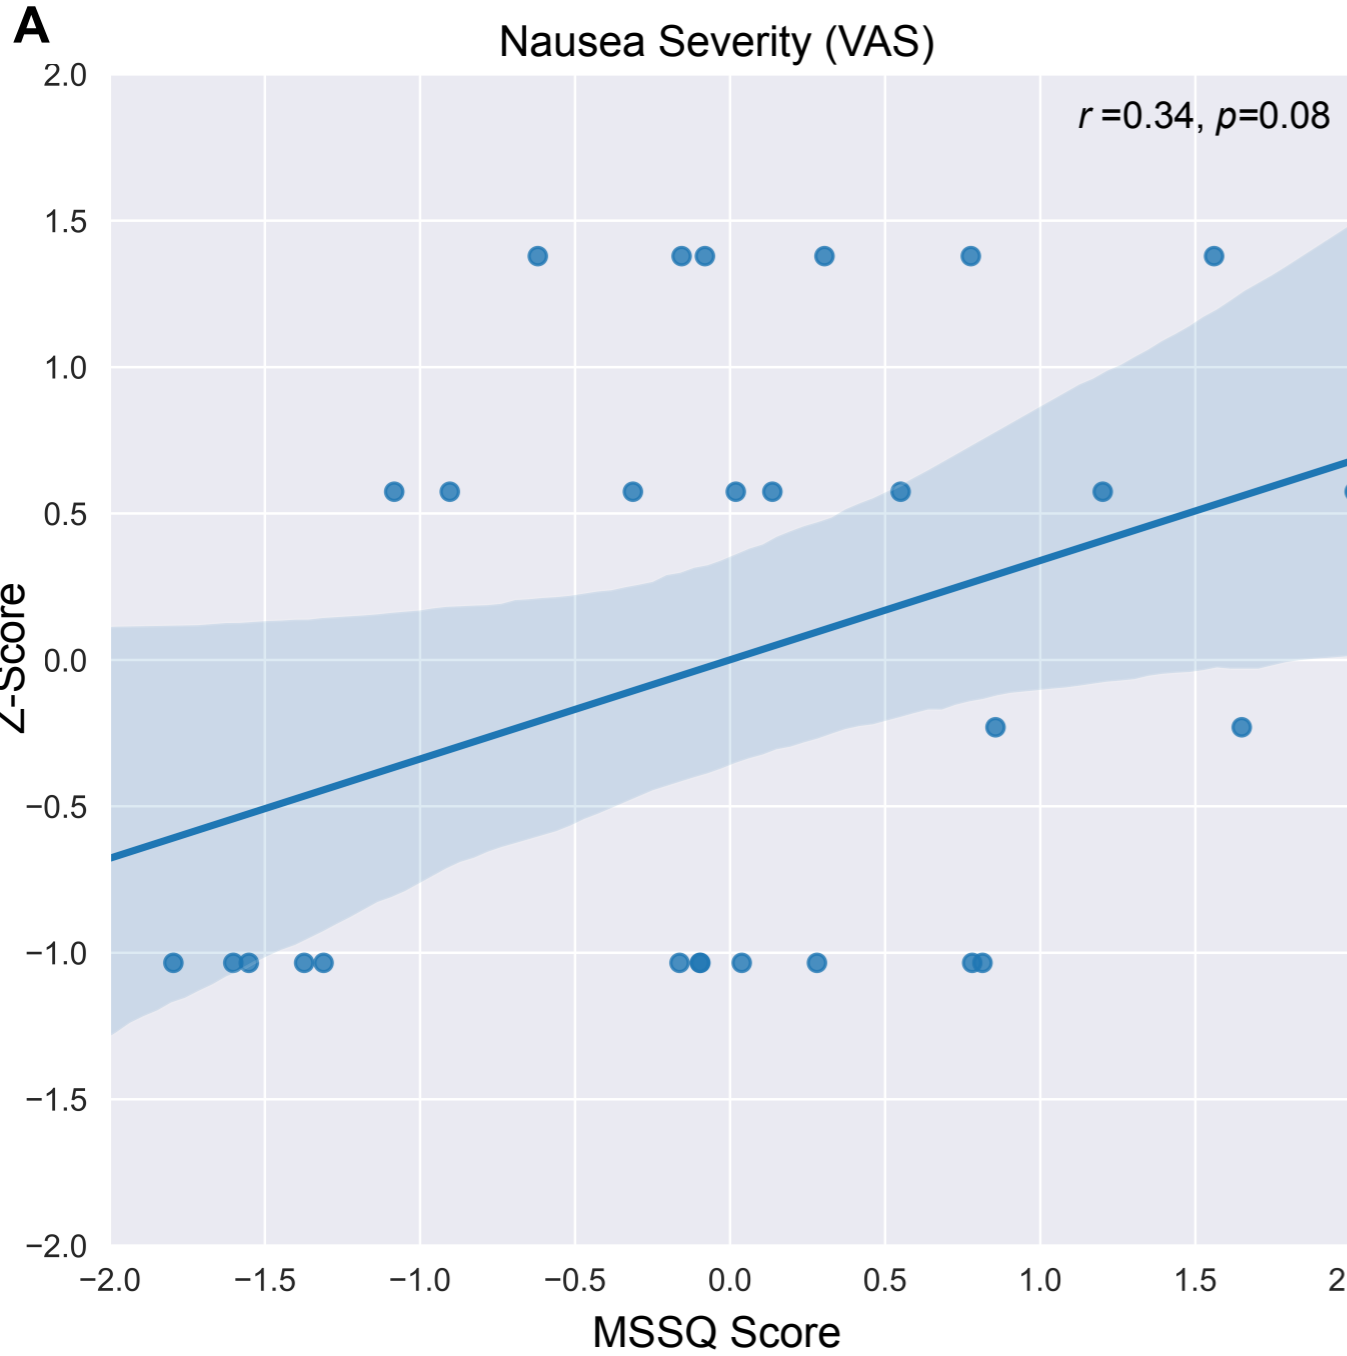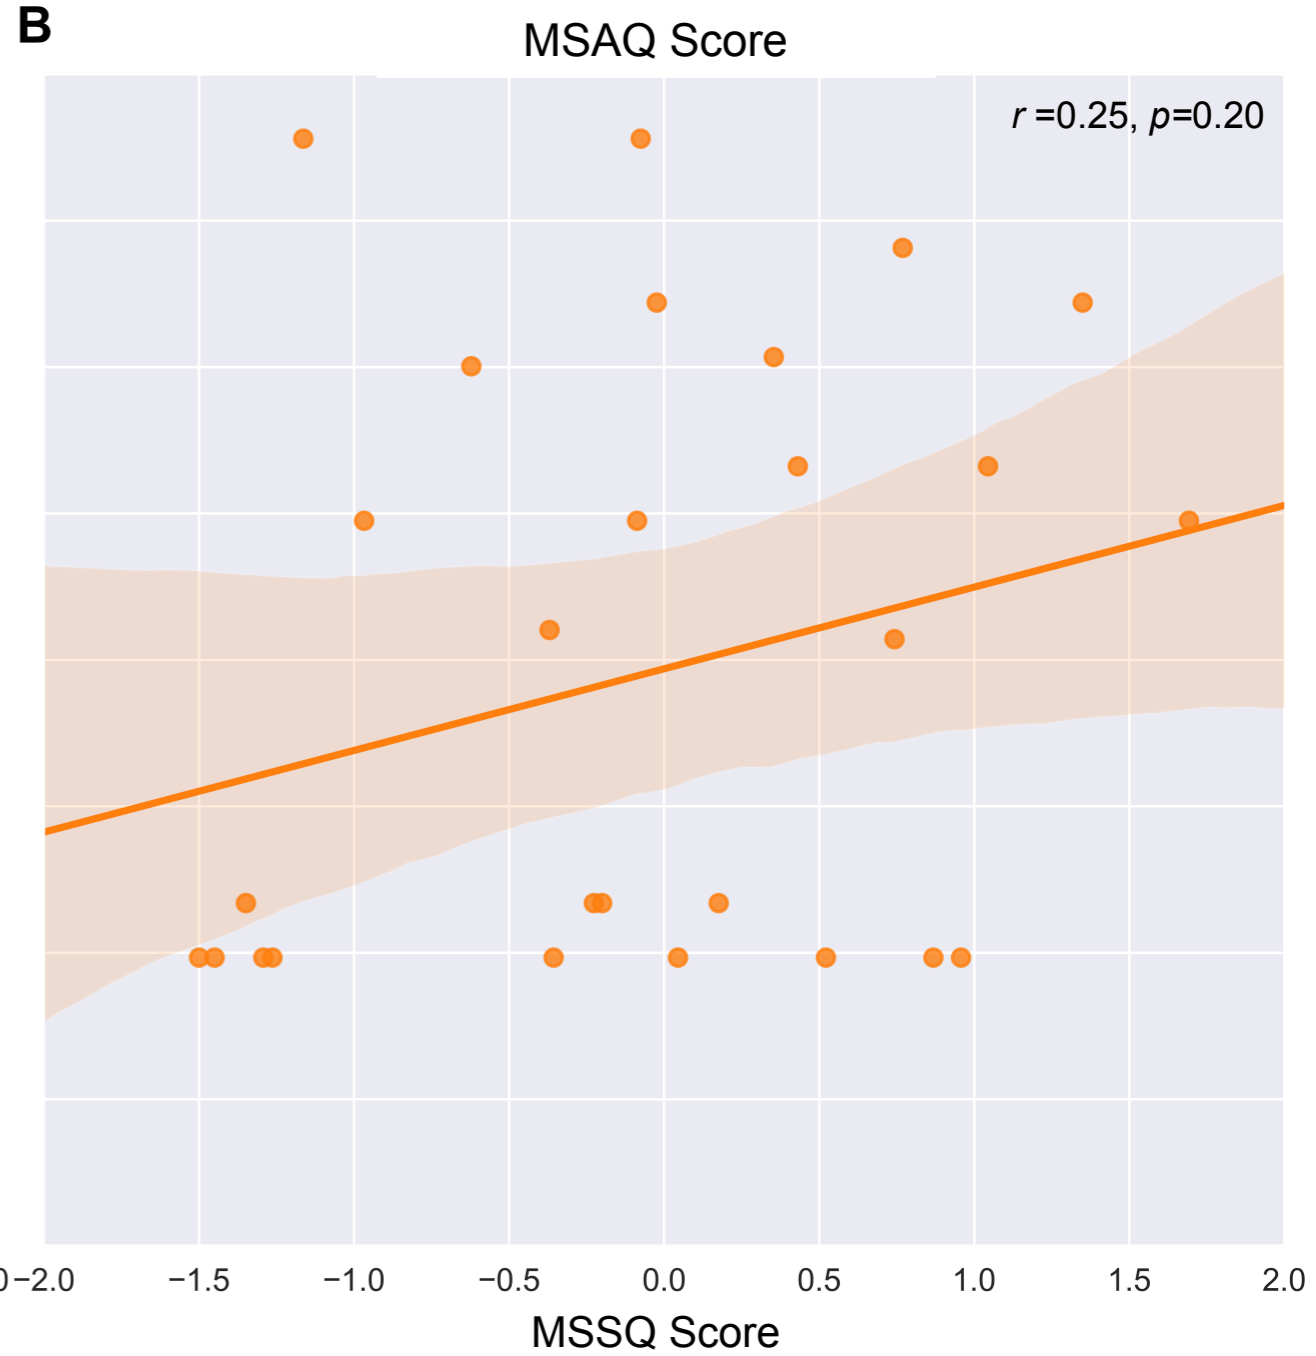

Supplement: TJP-597-1517-s001.pdf [file TJP-597-1517-s001.pdf]

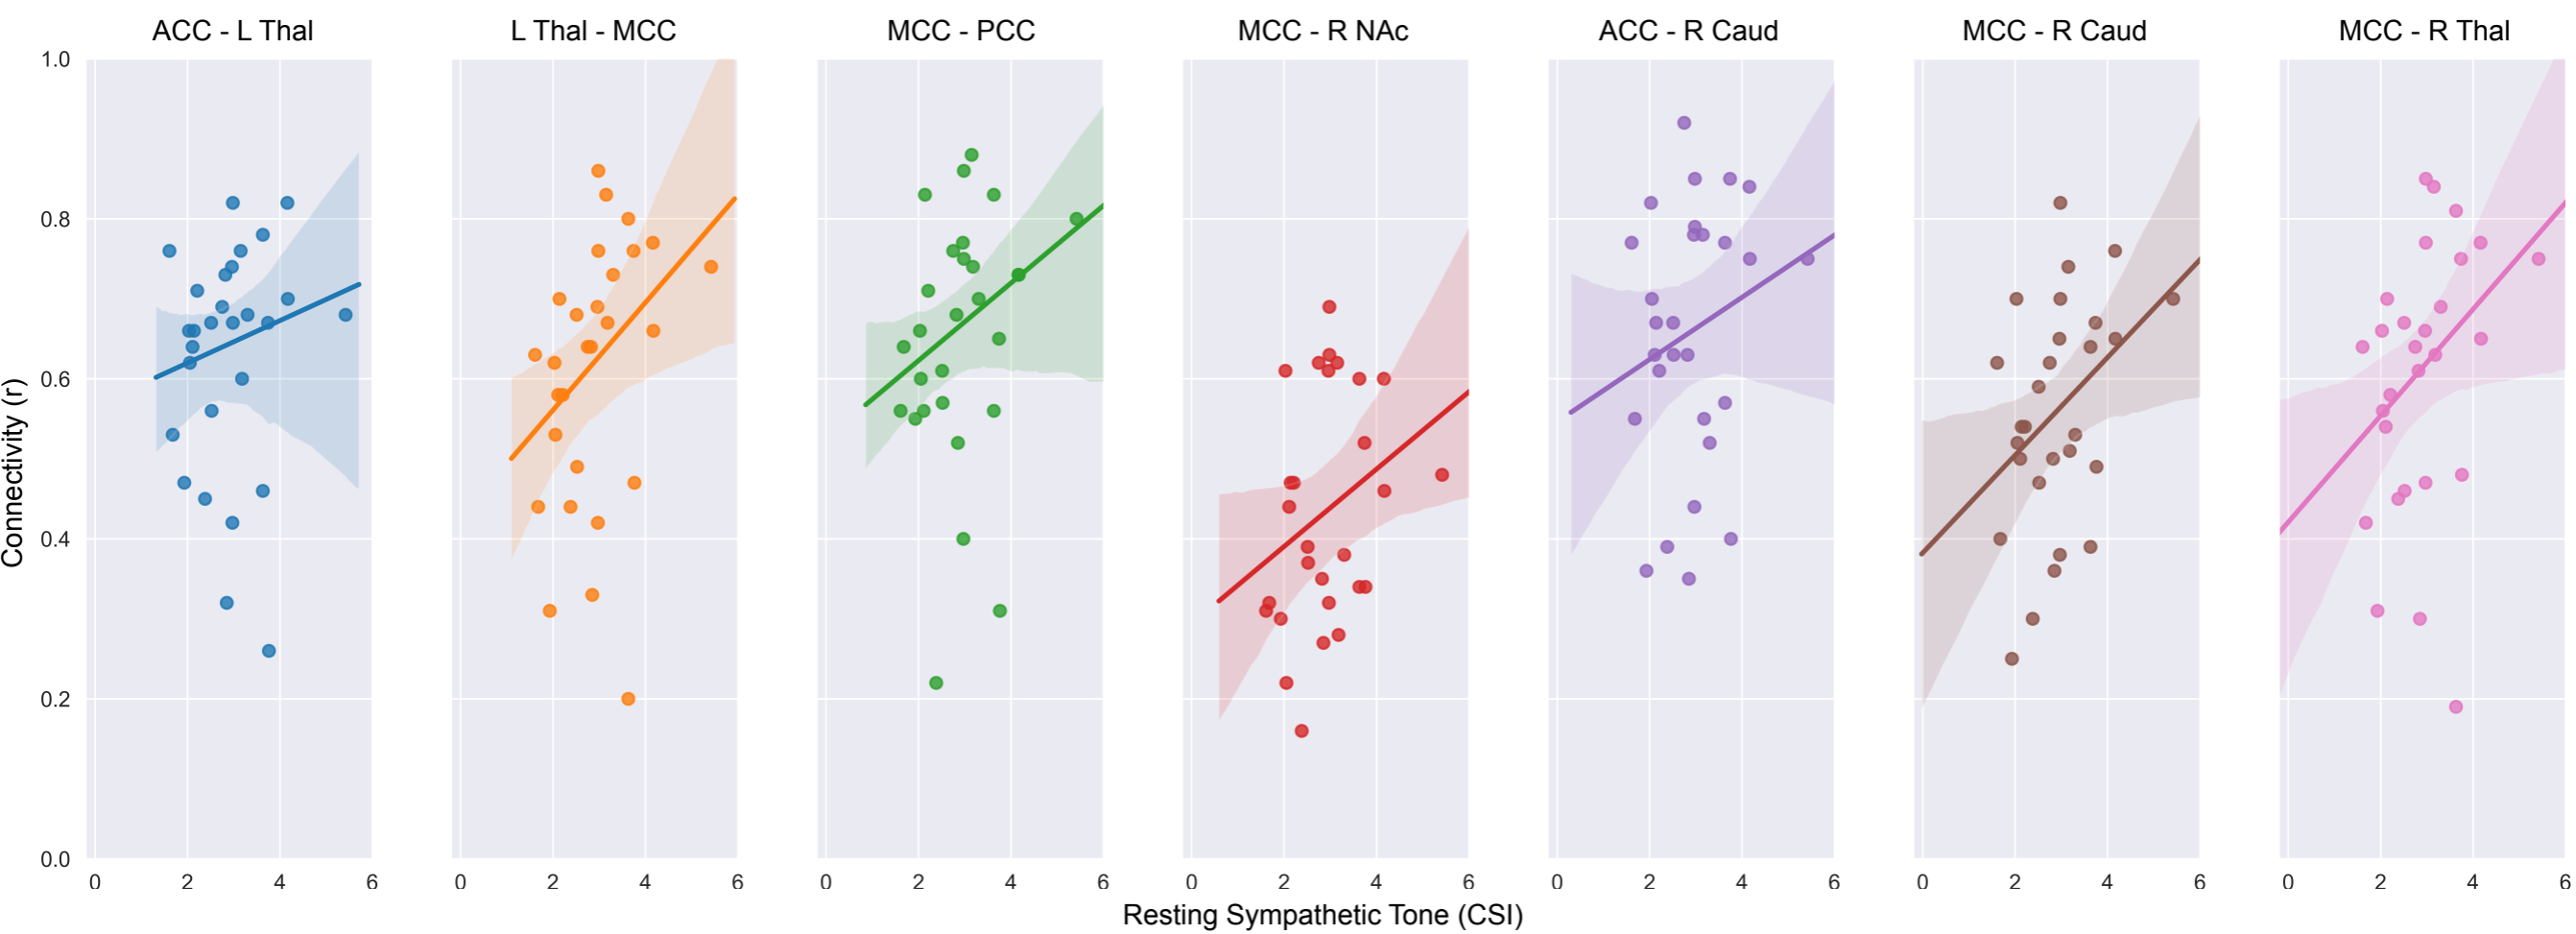

Supplement: TJP-597-1517-s002.pdf [file TJP-597-1517-s002.pdf]

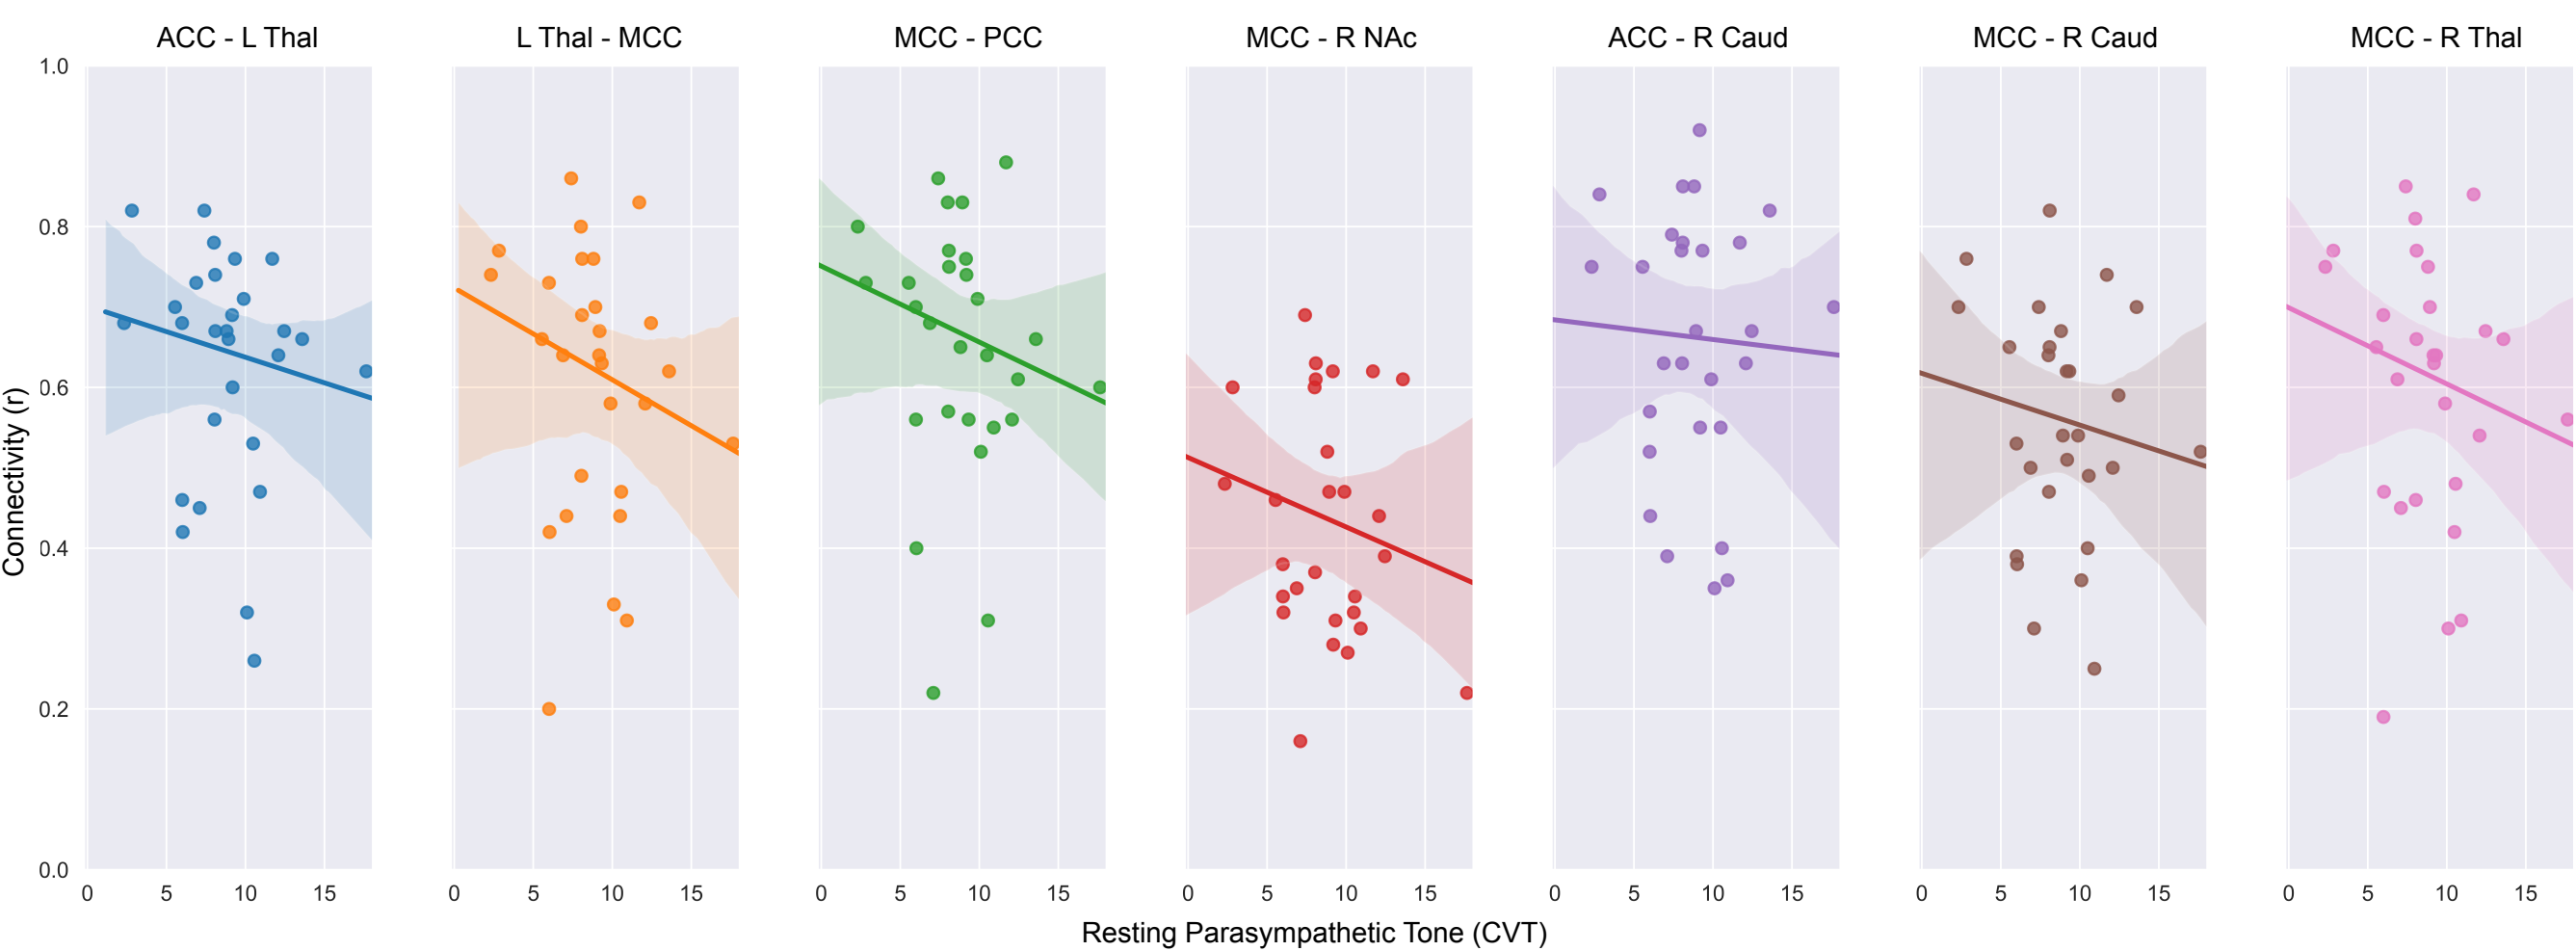

Supplement: TJP-597-1517-s003.pdf [file TJP-597-1517-s003.pdf]

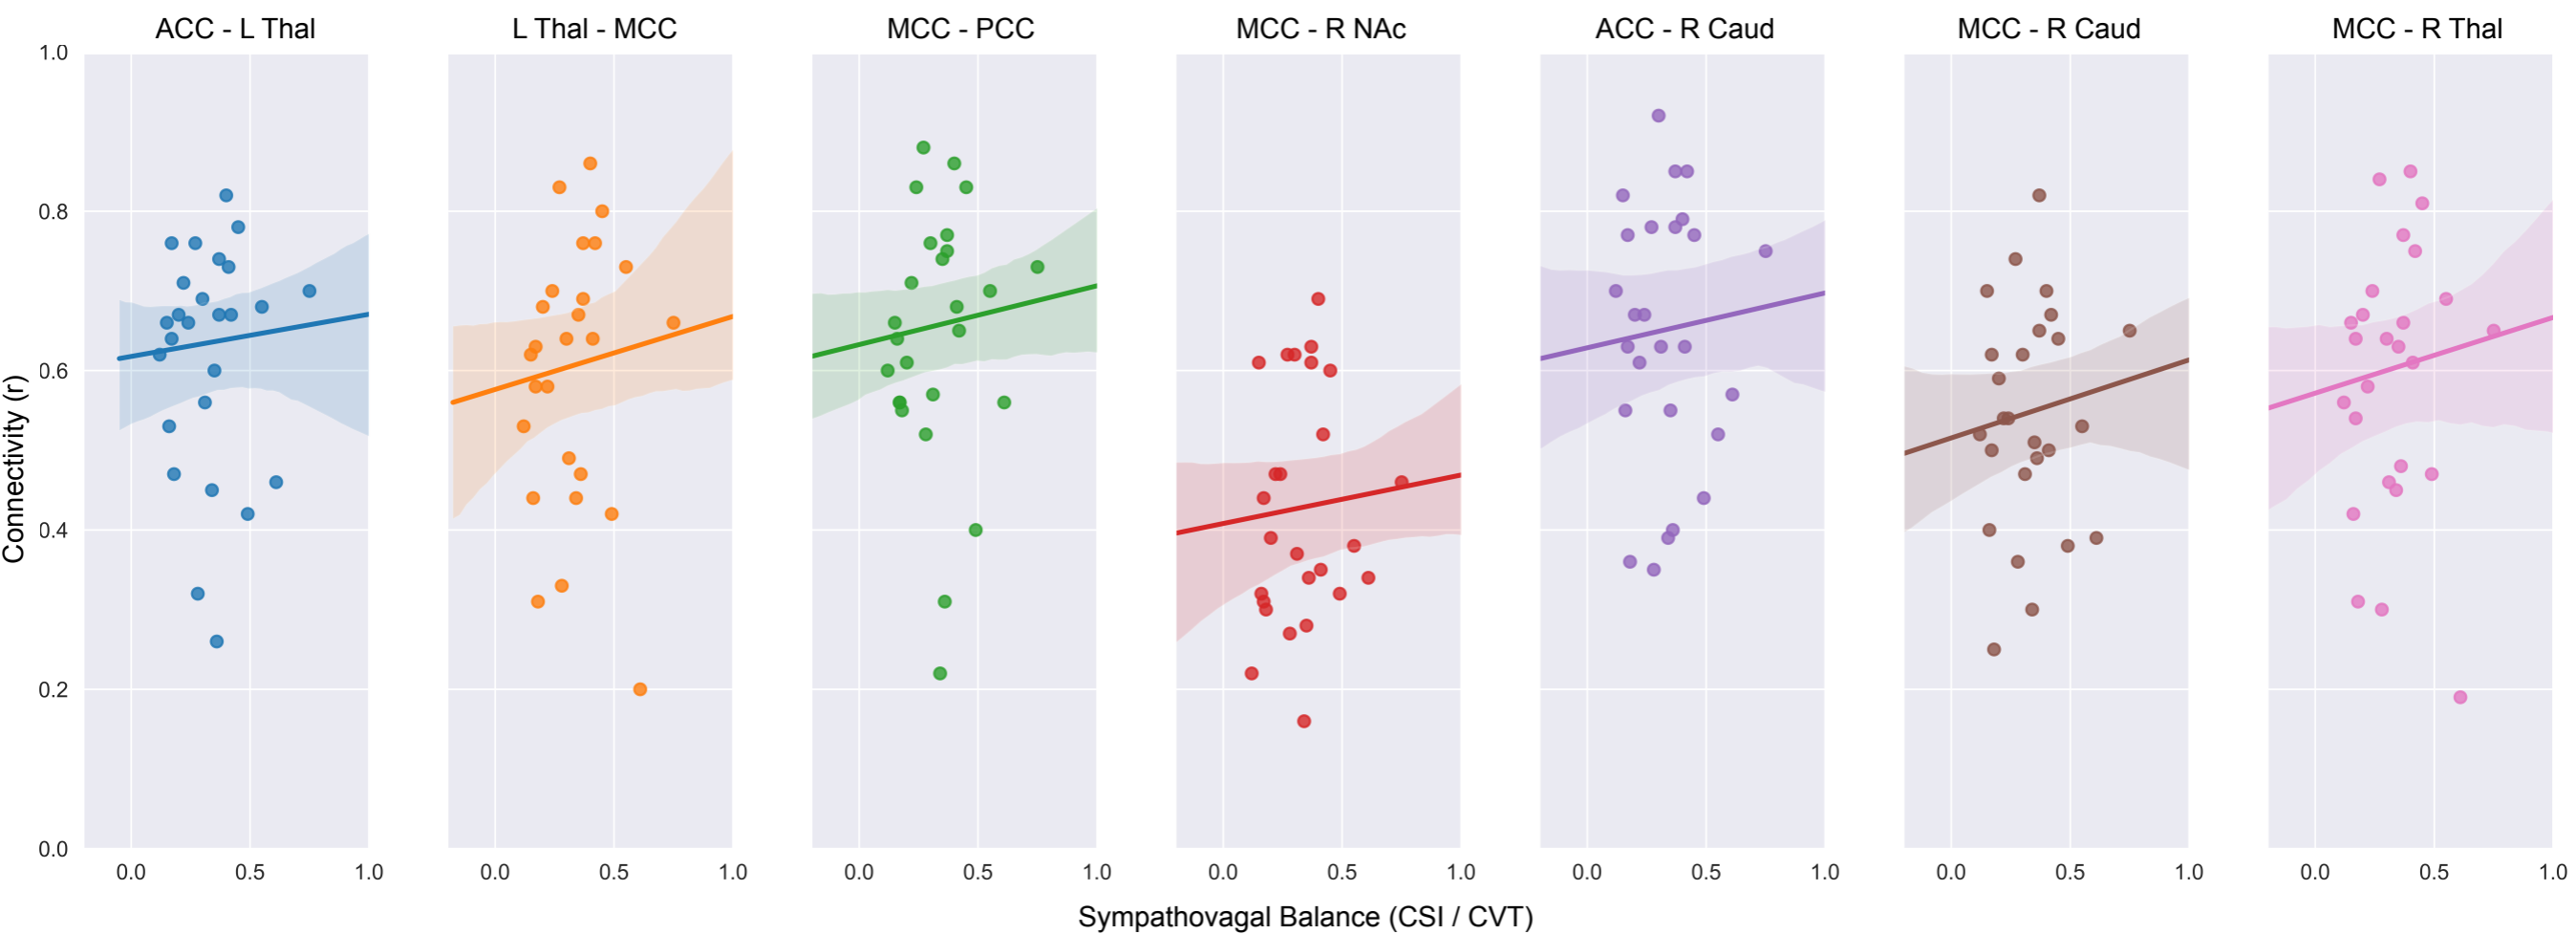

Supplement: TJP-597-1517-s004.pdf [file TJP-597-1517-s004.pdf]
